# Supplementary material for: A systematic model identification method for chemical transformation pathways – the case of heroin biomarkers in wastewater
Source: PubMed Central journal article supplement (PMC5571155; doi:10.1038/s41598-017-09313-y), 2017-08-24
Supplement: 41598_2017_9313_MOESM1_ESM.pdf [file 41598_2017_9313_MOESM1_ESM.pdf]

# Supplementary Information

## **A systematic model identification method for chemical transformation pathways – the case of heroin biomarkers in wastewater**

Pedram Ramin<sup>1,2</sup>, Borja Valverde-Pérez<sup>1</sup>, Fabio Polesel<sup>1</sup>, Luca Locatelli<sup>1</sup>, Benedek Gy. Plósz<sup>1,3</sup>

<sup>1</sup>Department of Environmental Engineering, Technical University of Denmark, Bygningstorvet 115, DK 2800 Kgs. Lyngby, Denmark;

<sup>2</sup>Process and Systems Engineering Center (PROSYS), Department of Chemical and Biochemical Engineering, Technical University of Denmark, Building 229, DK-2800 Kgs. Lyngby, Denmark

<sup>3</sup>Department of Chemical Engineering, University of Bath, Claverton Down, Bath BA2 7AY, UK

Correspondence and requests for materials should be addressed to P.R. ([pear@kt.dtu.dk](mailto:pear@kt.dtu.dk)) or B.GP. ([b.g.plosz@bath.ac.uk](mailto:b.g.plosz@bath.ac.uk))

Number of pages: 11

Number of figures: 5

Number of tables: 4

## Supplementary Tables

**Table S1.** Stoichiometric matrix and process rates for transformation of HER, and its human metabolites, 6MAM, MORG, MOR also including COE and NCOE, in raw wastewater (suspended biomass) adopted from Ramin et al.<sup>1</sup> Different process rates are associated with different stoichiometry indicated by numbers according to transformation pathway of chemicals,  $C_{LI}$ ,  $C_{SL}$  and  $C_{SW}$  are the concentration of drug biomarkers in the liquid phase, attached to suspended solids and attached to reactor wall. Model parameters are defined in Table S2.

| Processes                         | $C_{LI,HER}$ | $C_{LI,6MAM}$ | $C_{LI,MOR}$ | $C_{LI,MORG}$ | $C_{LI,COE}$ | $C_{LI,NCOE}$ | $C_{SL,HER}$ | $C_{SL,6MAM}$ | $C_{SL,MOR}$ | $C_{SL,MORG}$ | $C_{SL,COE}$ | $C_{SL,NCOE}$ | $C_{SW,HER}$ | $C_{SW,6MAM}$ | $C_{SW,MOR}$ | $C_{SW,MORG}$ | $C_{SW,COE}$ | $C_{SW,NCOE}$ | Process rates                                                                                                                                                                                                                                                                                                                               |
|-----------------------------------|--------------|---------------|--------------|---------------|--------------|---------------|--------------|---------------|--------------|---------------|--------------|---------------|--------------|---------------|--------------|---------------|--------------|---------------|---------------------------------------------------------------------------------------------------------------------------------------------------------------------------------------------------------------------------------------------------------------------------------------------------------------------------------------------|
| Abiotic transformation            | -1(i)        | -1(ii)        | -1(iii)      | -1(iv)        | -1(v)        | -1(vi)        |              |               |              |               |              |               |              |               |              |               |              |               | (i) $k_{abio,HER}C_{LI,HER}$ (ii) $k_{abio,6MAM}C_{LI,6MAM}$<br>(iii) $k_{abio,MOR}C_{LI,MOR}$ (iv) $(k_{abio,MORG,1} + k_{abio,MORG,2})C_{LI,MORG}$<br>(v) $C_{LI,COE,1}(k_{abio,COE,1} + k_{abio,COE,2})$ (vi) $k_{abio,NCOE}C_{LI,NCOE}$                                                                                                 |
| Abiotic formation                 |              | 1(i)          | 1(ii)        |               |              | 1(iii)        |              |               |              |               |              |               |              |               |              |               |              |               | (i) $k_{abio,HER}C_{LI,HER}(M_{6MAM}/M_{HER})$ (ii) $k_{abio,6MAM}C_{LI,6MAM}(M_{MOR}/M_{6MAM})$<br>+ $k_{abio,COE,2}C_{LI,COE}(M_{MOR}/M_{6COE})$ (iii) $k_{abio,COE,1}C_{LI,COE}(M_{NCOE}/M_{COE})$                                                                                                                                       |
| Biotransformation                 | -1(i)        | -1(ii)        | -1(iii)      | -1(iv)        | -1(v)        | -1(vi)        |              |               |              |               |              |               |              |               |              |               |              |               | (i) $k_{bio,HER}C_{LI,HER}X_{SS}$ (ii) $k_{bio,6MAM}C_{LI,6MAM}X_{SS}$<br>(iii) $k_{bio,MOR}C_{LI,MOR}X_{SS}$ (iv) $(k_{bio,MORG,1} + k_{bio,MORG,2})C_{LI,MORG}X_{SS}$<br>(v) $C_{LI,COE,1}(k_{bio,COE,1} + k_{bio,COE,2})X_{SS}$ (vi) $k_{abio,NCOE}C_{LI,NCOE}X_{SS}$                                                                    |
| Biotic formation                  |              | 1(i)          | 1(ii)        |               |              | 1(iii)        |              |               |              |               |              |               |              |               |              |               |              |               | (i) $k_{bio,HER}C_{LI,HER}(M_{6MAM}/M_{HER})X_{SS}$ (ii) $k_{bio,6MAM}C_{LI,6MAM}(M_{MOR}/M_{6MAM})X_{SS}$<br>+ $k_{bio,COE,2}C_{LI,COE}(M_{MOR}/M_{6COE})X_{SS}$ (iii) $k_{bio,COE,1}C_{LI,COE}(M_{NCOE}/M_{COE})X_{SS}$                                                                                                                   |
| De-sorption from wall             | 1(i)         | 1(ii)         | 1(iii)       | 1(iv)         |              |               |              |               |              |               |              |               | -1(i)        | -1(ii)        | -1(iii)      | -1(iv)        |              |               | (i) $K_{des,w,HER}C_{SW,HER}$ (ii) $K_{des,w,6MAM}C_{SW,6MAM}$ (iii) $K_{des,w,MOR}C_{SW,MOR}$<br>(iv) $K_{des,w,MORG}C_{SW,MORG}$ (v) $K_{des,w,COE}C_{SW,COE}$ (vi) $K_{des,w,NCOE}C_{SW,NCOE}$                                                                                                                                           |
| Sorption to wall                  | -1(i)        | -1(ii)        | -1(iii)      | -1(iv)        |              |               |              |               |              |               |              |               | 1(i)         | 1(ii)         | 1(iii)       | 1(iv)         |              |               | (i) $K_{des,w,HER}K_{d,w,HER}C_{SW,HER}\alpha_{SW}$ (ii) $K_{des,w,6MAM}K_{d,w,6MAM}C_{SW,6MAM}\alpha_{SW}$<br>(iii) $K_{des,w,MOR}K_{d,w,MOR}C_{SW,MOR}\alpha_{SW}$ (iv) $K_{des,w,MORG}K_{d,w,MORG}C_{SW,MORG}\alpha_{SW}$<br>(v) $K_{des,w,COE}K_{d,w,COE}C_{SW,COE}\alpha_{SW}$ (vi) $K_{des,w,NCOE}K_{d,w,NCOE}C_{SW,NCOE}\alpha_{SW}$ |
| De-sorption from suspended solids | 1(i)         | 1(ii)         | 1(iii)       | 1(iv)         |              |               | -1(i)        | -1(ii)        | -1(iii)      | -1(iv)        |              |               |              |               |              |               |              |               | (i) $K_{des,HER}C_{SL,HER}$ (ii) $K_{des,6MAM}C_{SL,6MAM}$ (iii) $K_{des,MOR}C_{SL,MOR}$<br>(iv) $K_{des,MORG}C_{SL,MORG}$ (v) $K_{des,COE}C_{SL,COE}$ (vi) $K_{des,NCOE}C_{SL,NCOE}$                                                                                                                                                       |
| Sorption to suspended solids      | -1(i)        | -1(ii)        | -1(iii)      | -1(iv)        |              |               | 1(i)         | 1(ii)         | 1(iii)       | 1(iv)         |              |               |              |               |              |               |              |               | (i) $k_{des,coc}K_{d,HER}C_{LI,HER}X_{SS}$ (ii) $k_{des,6MAM}K_{d,6MAM}C_{LI,6MAM}X_{SS}$<br>(iii) $k_{des,MOR}K_{d,MOR}C_{LI,MOR}X_{SS}$ (iv) $k_{des,MORG}K_{d,MORG}C_{LI,MORG}X_{SS}$<br>(v) $k_{des,COE}K_{d,COE}C_{LI,COE}X_{SS}$ (vi) $k_{des,NCOE}K_{d,NCOE}C_{LI,NCOE}X_{SS}$                                                       |

**Table S2.** Fate model parameter for HER and COE drug biomarkers

| Symbol        | Definition                                 | Unit                   | HER                       | MORG   | COE    | NCOE   | 6MAM   | MOR    |
|---------------|--------------------------------------------|------------------------|---------------------------|--------|--------|--------|--------|--------|
| $k_{des,w}$   | Desorption rate from reactor wall          | $d^{-1}$               | 100                       | 100    | 100    | 100    | 100    | 100    |
| $K_{dw}$      | Reactor wall–liquid partition coefficient  | $L\ dm^{-2}$           | 0.01                      | 0      | 0      | 0.02   | 0      | 0.03   |
| $k_{des}$     | Desorption rate from suspended solids      | $d^{-1}$               | 100                       | 100    | 100    | 100    | 100    | 100    |
| $K_d$         | Solid–liquid partition coefficient         | $L\ gTSS^{-1}$         | 0                         | 0      | 0      | 0.01   | 0.31   | 0      |
| $k_{abio}$    | Abiotic transformation rate constant       | $d^{-1}$               | See Table S3              |        |        |        |        |        |
| $k_{bio}$     | Biotransformation rate constant            | $L\ gTSS^{-1}\ d^{-1}$ | See Table S3              |        |        |        |        |        |
| $M$           | Biomarker molecular weight                 | $g\ mol^{-1}$          | 369.41                    | 461.46 | 299.36 | 285.34 | 327.37 | 285.34 |
| $X_{SS}$      | Concentration of suspended solids          | $gTSS\ L^{-1}$         | 0.318                     |        |        |        |        |        |
| $\alpha_{sw}$ | wet-surface-to-volume ratio of the reactor | $dm^2\ L^{-1}$         | Ramin et al. <sup>1</sup> |        |        |        |        |        |

**Table S3.** Estimated parameters at each level, including, parameter type, pathway, range of parameters and type of distribution at each level for the proposed calibration *Method 1*.

|            | Parameter type | Model          | Pathway          | parameter        | Min            | Max                       | Distribution       |         |         |
|------------|----------------|----------------|------------------|------------------|----------------|---------------------------|--------------------|---------|---------|
| Level 1    | Primary        | abiotic (A)    | HER→6MAM         | $k_{abio,HER}$   | 0              | 5                         | uniform            |         |         |
|            | Combinatorial  | abiotic (A)    | COE→COE+NCOE     | $k_{abio,COE}$   | 0              | 1                         | uniform            |         |         |
| Level 2    | Primary        | abiotic (A)    | 6MAM→MOR         | $k_{abio,6MAM}$  | 0              | 1                         | uniform            |         |         |
|            |                | abiotic (A)    | COE→NCOE         | $k_{abio,COE,1}$ | 0.0014         | 0.0843                    | generalized pareto |         |         |
|            |                | abiotic (A)    | COE→MOR          | $k_{abio,COE,2}$ | 0.0064         | 0.0862                    | rician             |         |         |
|            |                | abiotic (A)    | NCOE→T.P.        | $k_{abio,NCOE}$  | 0.0008         | 0.0843                    | weibull            |         |         |
|            | Combinatorial  | biotic (B)     | HER→6MAM+T.P.    | $k_{bio,HER}$    | 0              | 3000                      | uniform            |         |         |
|            |                | biotic (B)     | MORG→MOR+T.P.    | $k_{bio,MORG}$   | 0              | 4000                      | uniform            |         |         |
|            |                | biotic (B)     | COE→COE+NCOE     | $k_{bio,COE}$    | 0              | 2                         | uniform            |         |         |
|            | Subsidiary     | abiotic (A)    | HER→6MAM         | $k_{abio,HER}$   | 0.2261         | 0.5624                    | loglogistic        |         |         |
|            |                | abiotic (A)    | COE→COE+NCOE     | $k_{abio,COE}$   | 0.0216         | 0.0909                    | tlocationsscale    |         |         |
|            | Level 3        | Primary        | abiotic (A)      | MOR→T.P.         | $k_{abio,MOR}$ | 0                         | 1                  | uniform |         |
| biotic (B) |                |                | HER→6MAM         | $k_{bio,HER,1}$  | 0              | 290.1458                  | uniform            |         |         |
| biotic (B) |                |                | HER→T.P.         | $k_{bio,HER,2}$  | 0              | 290.1458                  | uniform            |         |         |
| biotic (B) |                |                | 6MAM→MOR         | $k_{bio,6MAM}$   | 0              | 5                         | uniform            |         |         |
| biotic (B) |                |                | COE→NCOE         | $k_{bio,COE,1}$  | 0              | 0.2081                    | uniform            |         |         |
| biotic (B) |                |                | COE→MOR          | $k_{bio,COE,2}$  | 0              | 0.2081                    | uniform            |         |         |
| biotic (B) |                |                | NCOE→T.P.        | $k_{bio,NCOE}$   | 0              | 1                         | uniform            |         |         |
| Subsidiary |                | abiotic (A)    | HER→6MAM         | $k_{abio,HER}$   | 0.2261         | 0.5624                    | loglogistic        |         |         |
|            |                | abiotic (A)    | 6MAM→MOR         | $k_{abio,6MAM}$  | 0.1023         | 0.3474                    | tlocationsscale    |         |         |
|            |                | abiotic (A)    | COE→NCOE         | $k_{abio,COE,1}$ | 0.0014         | 0.0843                    | generalized pareto |         |         |
|            |                | abiotic (A)    | COE→MOR          | $k_{abio,COE,2}$ | 0.0064         | 0.0862                    | rician             |         |         |
|            |                | abiotic (A)    | NCOE→T.P.        | $k_{abio,NCOE}$  | 0.0008         | 0.0843                    | weibull            |         |         |
|            |                | Level 4        | Primary          | biotic (B)       | MORG→MOR       | $k_{bio,MORG,1}$          | 0                  | 85.4330 | uniform |
|            |                |                |                  | biotic (B)       | MORG→T.P.      | $k_{bio,MORG,2}$          | 0                  | 85.4330 | uniform |
| biotic (B) | MOR→T.P.       |                |                  | $k_{bio,MOR}$    | 0              | 20                        | uniform            |         |         |
| Subsidiary | abiotic (A)    | HER→6MAM       | $k_{abio,HER}$   | 0.2261           | 0.5624         | loglogistic               |                    |         |         |
|            | abiotic (A)    | 6MAM→MOR       | $k_{abio,6MAM}$  | 0.1023           | 0.3474         | tlocationsscale           |                    |         |         |
|            | abiotic (A)    | MOR→T.P.       | $k_{abio,MOR}$   | 0.0269           | 0.7047         | generalized extreme value |                    |         |         |
|            | abiotic (A)    | COE→NCOE       | $k_{abio,COE,1}$ | 0.0014           | 0.0843         | generalized pareto        |                    |         |         |
|            | abiotic (A)    | COE→MOR        | $k_{abio,COE,2}$ | 0.0064           | 0.0862         | rician                    |                    |         |         |
|            | abiotic (A)    | NCOE→T.P.      | $k_{abio,NCOE}$  | 0.0008           | 0.0843         | weibull                   |                    |         |         |
|            | biotic (B)     | HER→6MAM       | $k_{bio,HER,1}$  | 2.9168           | 33.6060        | generalized extreme value |                    |         |         |
|            | biotic (B)     | HER→T.P.       | $k_{bio,HER,2}$  | 18.0626          | 54.8897        | logistic                  |                    |         |         |
|            | biotic (B)     | 6MAM→MOR       | $k_{bio,6MAM}$   | 1.1367           | 3.7540         | logistic                  |                    |         |         |
|            | biotic (B)     | COE→NCOE       | $k_{bio,COE,1}$  | 0.0046           | 0.3925         | generalized pareto        |                    |         |         |
|            | biotic (B)     | COE→MOR        | $k_{bio,COE,2}$  | 0.0055           | 0.4227         | generalized pareto        |                    |         |         |
| biotic (B) | NCOE→T.P.      | $k_{bio,NCOE}$ | 0.0177           | 0.7069           | nakagami       |                           |                    |         |         |

**Table S4.** Estimated parameters using 3 different calibration methods. Estimated values are reported as median with uncertainty reported as 95% credibility interval (lower bound, upper bound). Abbreviations: T.P. = transformation product(s).

|                                   | Pathway   | Abiotic model parameters, $k_{abio}$ (d <sup>-1</sup> ) |                         |                         | Biotic model parameters, $k_{bio}$ (L gTSS d <sup>-1</sup> ) |                              |                           |
|-----------------------------------|-----------|---------------------------------------------------------|-------------------------|-------------------------|--------------------------------------------------------------|------------------------------|---------------------------|
|                                   |           | method 1                                                | method 2                | method 3                | method 1                                                     | method 2                     | method 3                  |
| Heroin (HER)                      | HER→      | 0.351                                                   | 2.429                   | 0.351                   | 15.057                                                       | 99.735                       | 16.997                    |
|                                   | 6MAM      | (0.226,0.562)                                           | (0.117, 4.889)          | (0.226, 0.562)          | (2.917, 33.606)                                              | (4.337, 194.178)             | (2.661, 44.769)           |
|                                   | HER→T.P.  | 0                                                       | 0                       | 0                       | 38.045<br>(18.063, 54.890)                                   | 135.546<br>(6.626, 293.389)  | 34.600<br>(6.829, 48.937) |
| 6-monoacetylmorphine (6-MAM)      | 6MAM→     | 0.218                                                   | 1.489                   | 0.184                   | 2.201                                                        | 37.440                       | 2.473                     |
|                                   | MOR       | (0.102, 0.347)                                          | (0.104, 4.761)          | (0.110, 0.308)          | (1.137, 3.754)                                               | (1.322, 97.069)              | (1.219, 6.779)            |
| Morphine-3-β-D-glucuronide (MORG) | MORG→     | 0                                                       | 0                       | 0                       | 11.488                                                       | 115.930                      | 15.668                    |
|                                   | MOR       |                                                         |                         |                         | (0.722, 55.372)                                              | (4.551, 289.899)             | (0.801, 53.730)           |
|                                   | MORG→T.P. | 0                                                       | 0                       | 0                       | 50.672<br>(11.328, 78.832)                                   | 273.698<br>(18.489, 487.744) | 42.533<br>(4.471, 57.399) |
| Morphine (MOR)                    | MOR→T.P.  | 0.170<br>(0.027, 0.705)                                 | 1.191<br>(0.149, 3.750) | 0.164<br>(0.035, 0.874) | 1.458<br>(0.077, 14.718)                                     | 18.057<br>(0.729, 48.463)    | 3.442<br>(0.205, 18.486)  |
| Codeine (COE)                     | COE→NCOE  | 0.044<br>(0.006, 0.086)                                 | 0.406<br>(0.020, 0.962) | 0.036<br>(0.006, 0.053) | 0.114<br>(0.005, 0.393)                                      | 0.835<br>(0.037, 1.935)      | 0.110<br>(0.004, 0.204)   |
|                                   | COE→MOR   | 0.026<br>(0.001, 0.084)                                 | 0.408<br>(0.019, 0.959) | 0.018<br>(0.001, 0.048) | 0.146<br>(0.005, 0.423)                                      | 0.726<br>(0.029, 1.934)      | 0.098<br>(0.004, 0.204)   |
| Norcodeine (NCOE)                 | NCOE→T.P. | 0.021<br>(0.001, 0.084)                                 | 0.365<br>(0.022, 0.958) | 0.017<br>(0.001, 0.092) | 0.246<br>(0.018, 0.707)                                      | 0.850<br>(0.043, 1.932)      | 0.332<br>(0.056, 0.772)   |

## Supplementary Figures

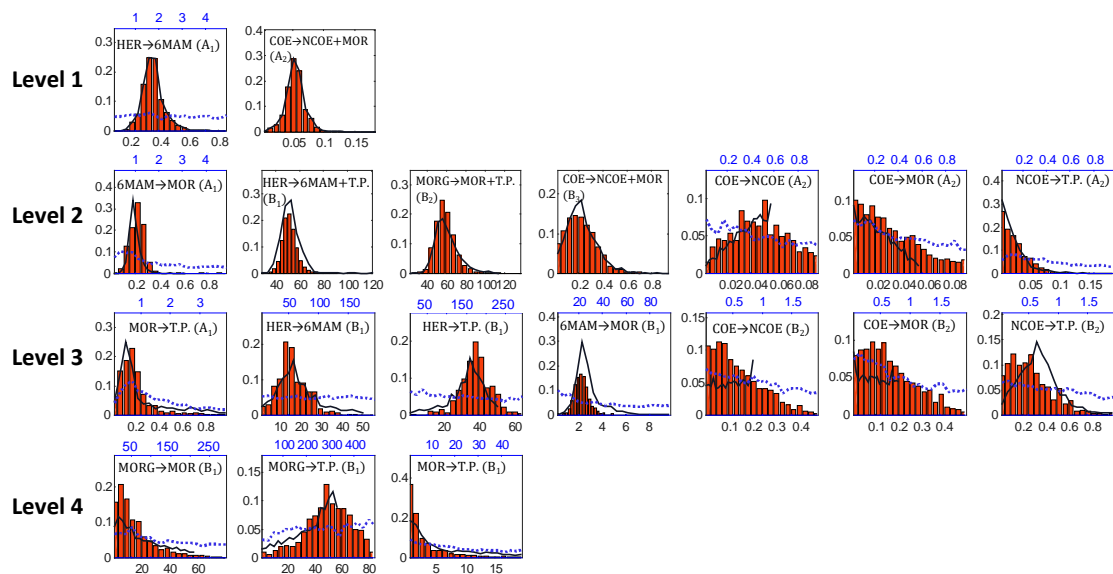

**Figure S1.** Posterior distribution of estimated parameters (histograms) for proposed methodology-*Method 1* (in red), *Method 2* (dotted blue line, upper X axis) and method 3 (full black line) at 4 different levels. Abbreviations: T.P. = unknown Transformation Product; A= Abiotic model, B= Biotic model.

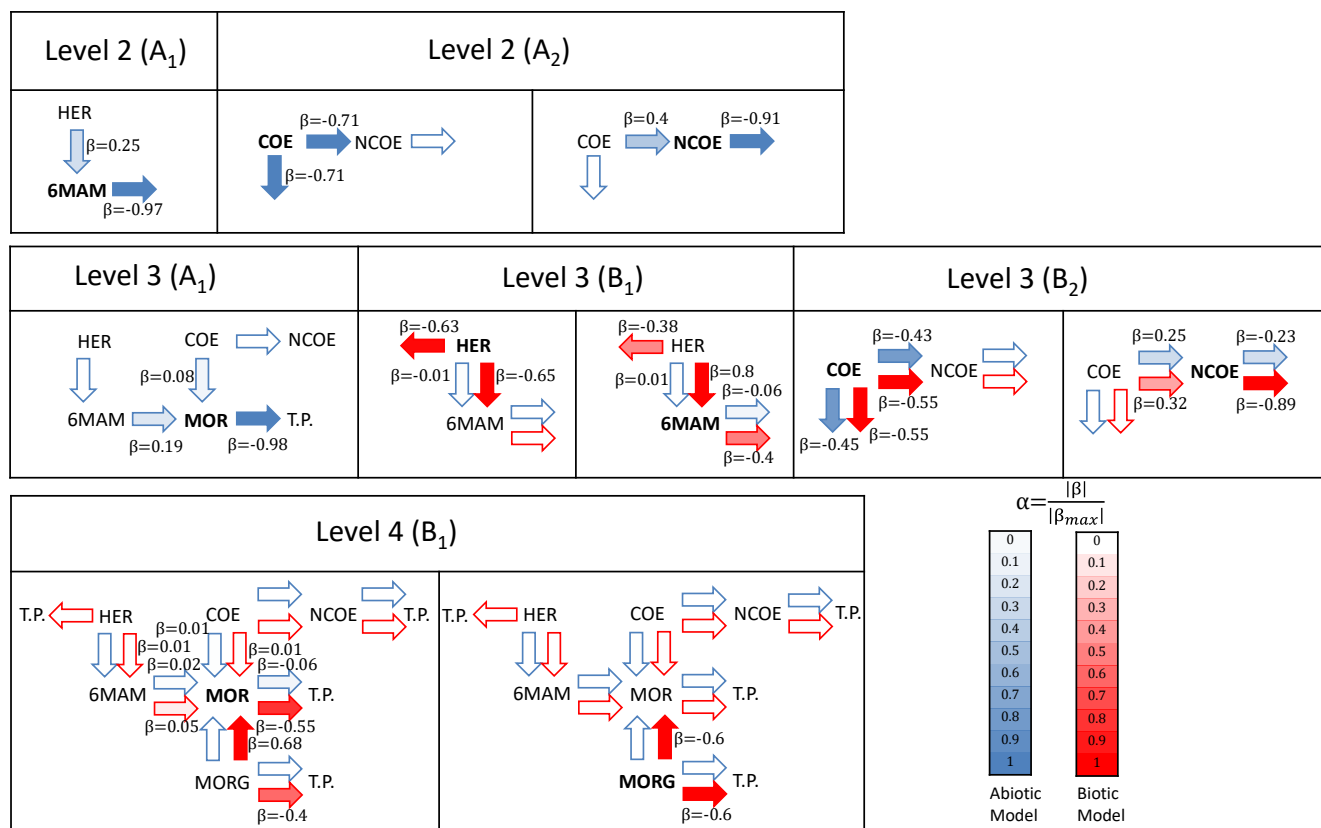

**Figure S2.** Global sensitivity analysis using standardized regression coefficient (SRC<sup>2</sup>) to assess the importance of abiotic and biotic model parameters uncertainty propagation according to *Method 1*. Regression coefficient,  $\beta$ , is used to rank the importance of *subsidiary* parameters on estimation of *primary* parameters at each calibration level. At each level, the sensitivity is explored for one model output, i.e., concentration of a chemical shown in bold. Sensitivity of parameters was used as an indication of error propagation (i.e., higher absolute  $\beta$  value implies more influential propagation indicated using increasing color intensity in each arrow). Direction of blue (abiotic processes) and red (biotic processes) arrows follows the transformation pathways similar to Fig. 1.  $\alpha$  is the absolute ratio of  $\beta$  values to a maximum  $\beta$  value ( $\beta_{max}$ ) at each level for each chemical, representing color intensities.  $\beta$  values equal to zero are not shown.

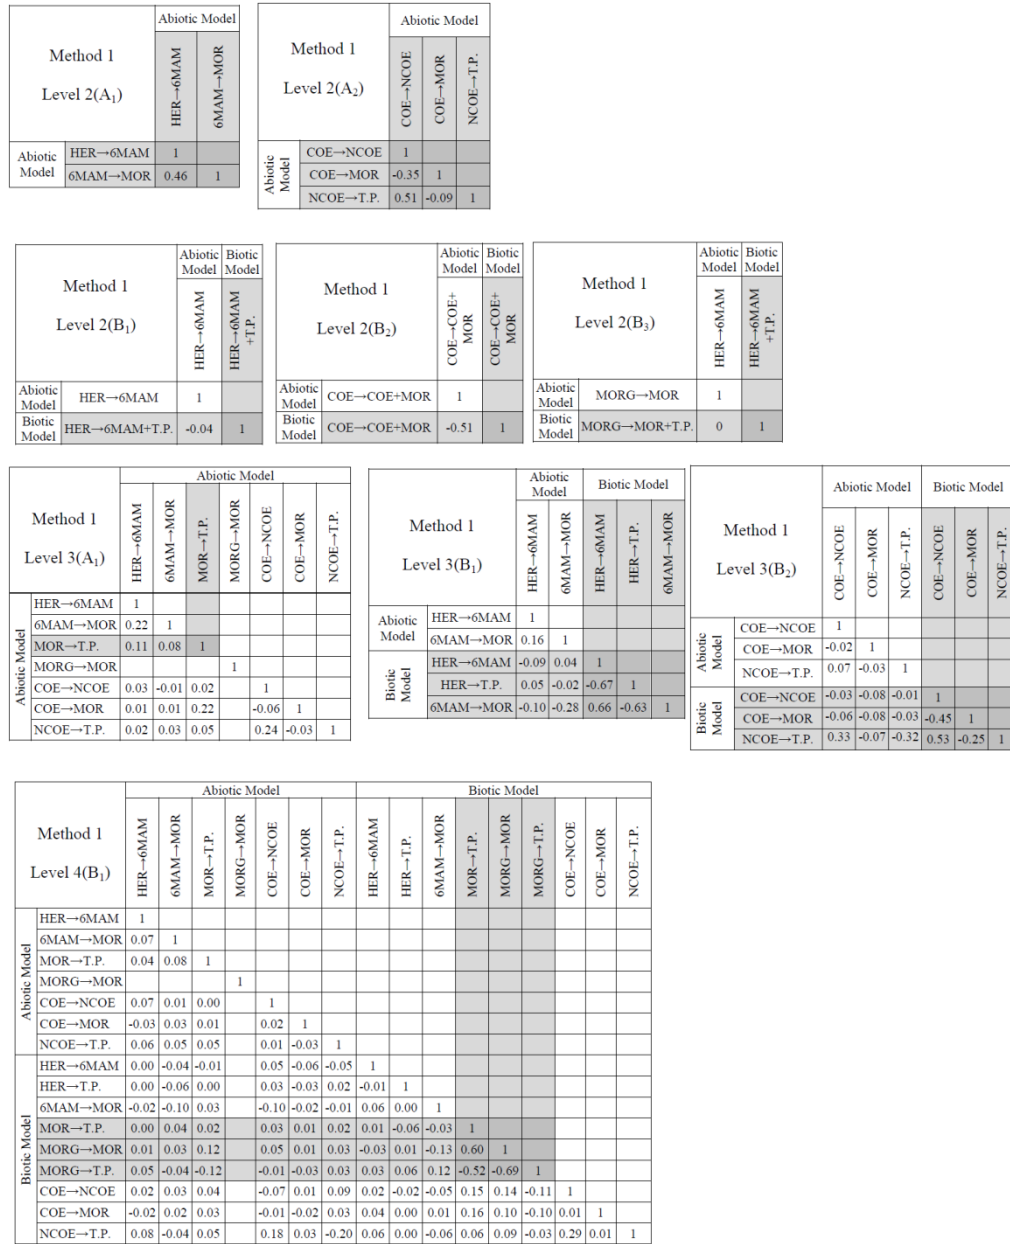

**Figure S3.** Co-linearity matrix between model parameters at each level for *Method 1*. Parameters in the shadings are the ones calibrated at each level.



| Method 2<br>Abiotic Model |           | Abiotic Model |          |          |          |          |         |           |
|---------------------------|-----------|---------------|----------|----------|----------|----------|---------|-----------|
|                           |           | HER→6MAM      | 6MAM→MOR | MOR→T.P. | MORG→MOR | COE→NCOE | COE→MOR | NCOE→T.P. |
| Abiotic Model             | HER→6MAM  | 1             |          |          |          |          |         |           |
|                           | 6MAM→MOR  | 0.00          | 1        |          |          |          |         |           |
|                           | MOR→T.P.  | 0.04          | 0.22     | 1        |          |          |         |           |
|                           | MORG→MOR  |               |          |          | 1        |          |         |           |
|                           | COE→NCOE  | 0.01          | 0.05     | 0.07     |          | 1        |         |           |
|                           | COE→MOR   | -0.02         | 0.10     | 0.17     |          | 0.11     | 1       |           |
|                           | NCOE→T.P. | 0.01          | 0.12     | 0.15     |          | 0.25     | 0.04    | 1         |

| Method 2<br>Biotic Model |           | Abiotic Model |          |          |          |          |         |           | Biotic Model |          |          |          |          |           |          |         |           |
|--------------------------|-----------|---------------|----------|----------|----------|----------|---------|-----------|--------------|----------|----------|----------|----------|-----------|----------|---------|-----------|
|                          |           | HER→6MAM      | 6MAM→MOR | MOR→T.P. | MORG→MOR | COE→NCOE | COE→MOR | NCOE→T.P. | HER→6MAM     | HER→T.P. | 6MAM→MOR | MOR→T.P. | MORG→MOR | MORG→T.P. | COE→NCOE | COE→MOR | NCOE→T.P. |
| Abiotic Model            | HER→6MAM  | 1             |          |          |          |          |         |           |              |          |          |          |          |           |          |         |           |
|                          | 6MAM→MOR  | -0.02         | 1        |          |          |          |         |           |              |          |          |          |          |           |          |         |           |
|                          | MOR→T.P.  | 0.01          | 0.04     | 1        |          |          |         |           |              |          |          |          |          |           |          |         |           |
|                          | MORG→MOR  |               |          |          | 1        |          |         |           |              |          |          |          |          |           |          |         |           |
|                          | COE→NCOE  | 0.04          | 0.05     | 0.01     |          | 1        |         |           |              |          |          |          |          |           |          |         |           |
|                          | COE→MOR   | -0.02         | 0.01     | 0.00     |          | 0.10     | 1       |           |              |          |          |          |          |           |          |         |           |
|                          | NCOE→T.P. | 0.03          | 0.01     | -0.03    |          | 0.22     | 0.03    | 1         |              |          |          |          |          |           |          |         |           |
| Biotic Model             | HER→6MAM  | 0.04          | -0.01    | -0.01    |          | 0.00     | 0.01    | -0.01     | 1            |          |          |          |          |           |          |         |           |
|                          | HER→T.P.  | 0.01          | -0.03    | -0.02    |          | -0.01    | 0.05    | -0.03     | 0.00         | 1        |          |          |          |           |          |         |           |
|                          | 6MAM→MOR  | -0.01         | 0.06     | 0.03     |          | 0.03     | 0.02    | 0.02      | -0.03        | 0.00     | 1        |          |          |           |          |         |           |
|                          | MOR→T.P.  | 0.04          | 0.04     | 0.05     |          | 0.04     | 0.07    | 0.00      | 0.03         | 0.02     | 0.19     | 1        |          |           |          |         |           |
|                          | MORG→MOR  | 0.00          | 0.01     | 0.03     |          | 0.02     | 0.05    | 0.02      | 0.00         | 0.02     | -0.02    | 0.14     | 1        |           |          |         |           |
|                          | MORG→T.P. | -0.04         | 0.01     | -0.06    |          | 0.01     | -0.03   | 0.00      | -0.03        | -0.04    | 0.03     | -0.16    | 0.11     | 1         |          |         |           |
|                          | COE→NCOE  | 0.03          | 0.00     | 0.00     |          | -0.06    | 0.05    | 0.18      | -0.03        | -0.01    | 0.08     | 0.10     | 0.04     | -0.10     | 1        |         |           |
| COE→MOR                  | 0.00      | 0.03          | -0.01    |          | 0.07     | 0.04     | -0.05   | -0.01     | 0.04         | 0.07     | 0.09     | 0.00     | -0.02    | -0.01     | 1        |         |           |
| NCOE→T.P.                | 0.05      | 0.04          | 0.07     |          | 0.18     | 0.01     | -0.19   | 0.00      | 0.03         | 0.04     | 0.05     | 0.05     | -0.06    | 0.05      | 0.06     | 1       |           |

**Figure S4.** Co-linearity matrix between for abiotic and biotic model parameters for *Method 2*. Parameters in the shadings are the ones calibrated at each level.

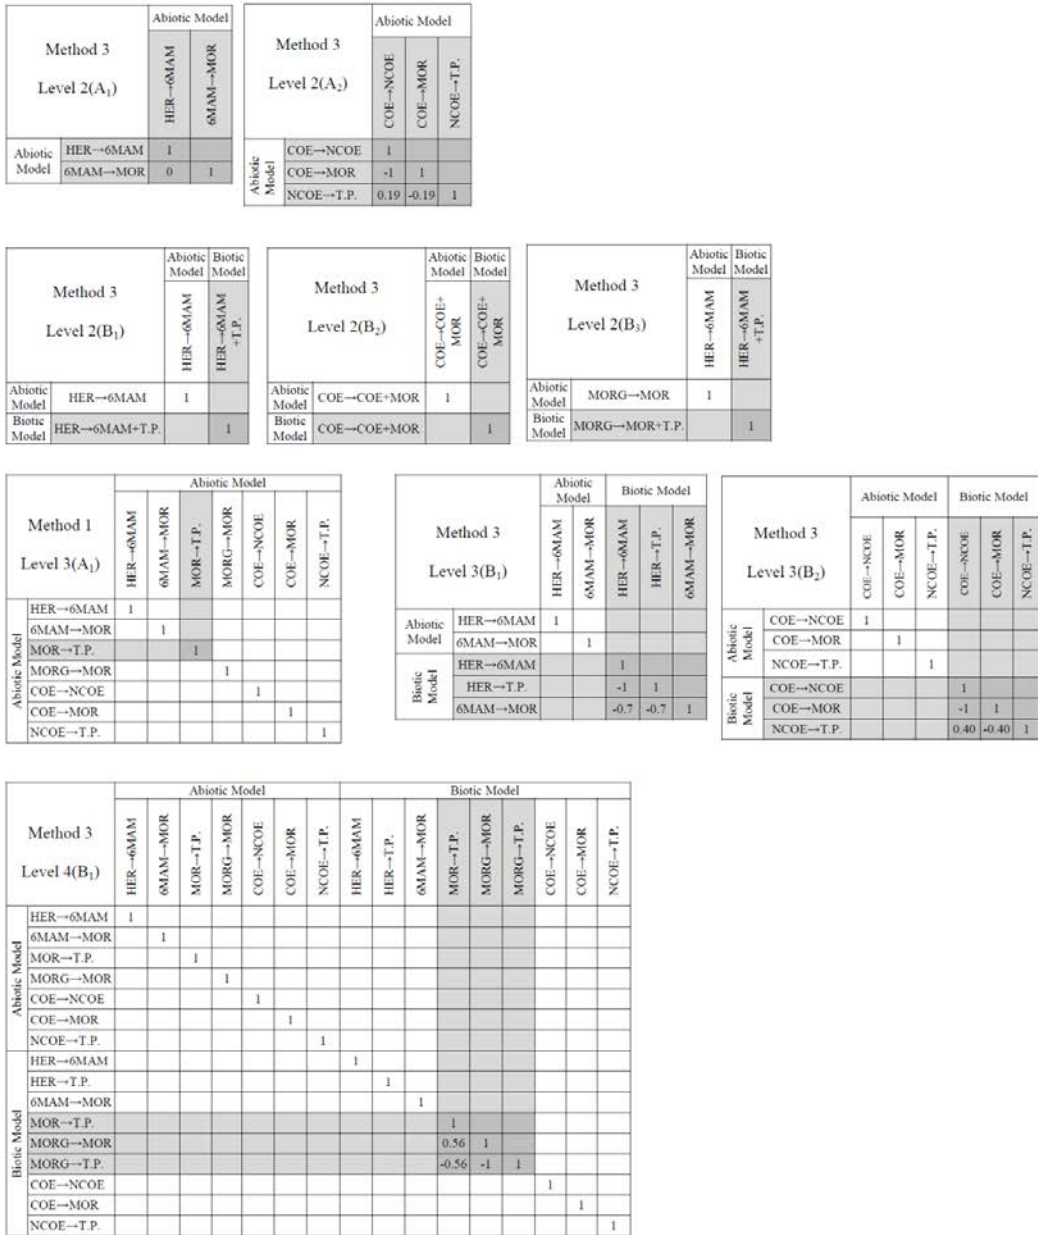

**Figure S5.** Co-linearity matrix between for abiotic and biotic model parameters for *Method*. Parameters in the shadings are the ones calibrated at each level.

# References

1. Ramin, P., Brock, A. L., Polesel, F., Causanilles, A., Emke, E., de Voogt, P. & Plósz, B. G. Transformation and sorption of illicit drug biomarkers in sewer systems: understanding the role of suspended solids in raw wastewater. *Environ. Sci. Technol.* 2016, **50** (24), 13397–13408.
2. Sin, G., Gernaey, K. V., Neumann, M. B., van Loosdrecht, M. C. M. & Gujer, W. Global sensitivity analysis in wastewater treatment plant model applications: Prioritizing sources of uncertainty. *Water Res.* **45**, 639–651 (2011).
